# Supplementary material for: Antidepressant drugs act by directly binding to TRKB neurotrophin receptors
Source: PubMed Central journal article supplement (PMC7938888; doi:10.1016/j.cell.2021.01.034), 2021-03-04
Supplement: mmc2.pdf [file mmc2.pdf]

**Table S2.** Levels of fluoxetine (15mg/kg in the drinking water for 21 days) in the prefrontal cortex of mice.

| Mouse ID | genotype | tissue (mg) | FLX ug/ml | ug/g wet tissue | ug/ml* | uM**  |
|----------|----------|-------------|-----------|-----------------|--------|-------|
| PC1260   | wt       | 32.0        | 1.575     | 9.846           | 10.29  | 33.30 |
| PC1262   | wt       | 33.6        | 1.497     | 8.908           | 9.31   | 30.13 |
| PC1431   | wt       | 20.4        | 0.393     | 3.856           | 4.03   | 13.04 |
| PC1451   | wt       | 30.8        | 1.642     | 10.662          | 11.14  | 36.06 |
| PC1452   | wt       | 30.9        | 1.024     | 6.629           | 6.93   | 22.42 |
| PC1428   | het      | 29.5        | 1.368     | 9.273           | 9.69   | 31.36 |
| PC1439   | het      | 12.6        | 0.379     | 6.013           | 6.28   | 20.34 |
| PC1458   | het      | 27.0        | 2.739     | 20.292          | 21.21  | 68.63 |

\* brain density: 1.045g/ml; \*\* fluoxetine MW: 309g/mol.
